# Supplementary material
Source: publisher site journal article supplement (https://www.dovepress.com/article/391378)
Supplement: Supplementary file 1 [file get_supplementary_file.php]

**Supplementary material**

Materials and methods

Table S1. Sample size calculated for each of the genes.

| Gene | Outcome | % in cases | % in controls | Cases (1)* | | Controls (3)* | | Ref. |
| --- | --- | --- | --- | --- | --- | --- | --- | --- |
| **Kelsey** | **Fleiss** | **Kelsey** | **Fleiss** |
| *sfa/foc* | Pyelonephritis/cystitis | 55 | 29 | 36 | 36 | 108 | 108 | [1] |
| *fyuA* | Persistent-relapse/cure-re-infection | 88 | 66 | 45 | 40 | 135 | 120 | [2] |
| *fimH* | Pyelonephritis/cystitis | 88 | 45 | 14 | 12 | 42 | 36 | [3] |
| *iroN* | Persistent-relapse/cure-re-infection | 71 | 42 | 32 | 30 | 96 | 90 | [3] |
| *aer* | Pyelonephritis/cystitis | 77 | 45 | 26 | 24 | 78 | 72 | [4] |
| *hlyA* | Pyelonephritis/cystitis | 38 | 15 | 33 | 36 | 99 | 108 | [4] |
| *cvaC* | Pyelonephritis/cystitis | 41 | 9 | 15 | 17 | 45 | 51 | [2] |
| *iutA* | Pyelonephritis/cystitis | 71 | 35 | 20 | 20 | 60 | 60 | [5] |
| *ireA* | Pyelonephritis/cystitis | 47 | 13 | 16 | 17 | 48 | 51 | [6] |

* Sample size calculation was performed with open-source calculator-SSCC from OpenEpi, Version 3.01, which uses the methodology of Kelsey et al., Methods in Observational Epidemiology 2nd Edition, and Fleiss, Statistical Methods for Rates and Proportions, formulas 3.18 & 3.19.

Table S2. PCR conditions for molecular characterization of UPEC.

| Gen | Primers | Conditions of the PCR | | | | | |
| --- | --- | --- | --- | --- | --- | --- | --- |
| **Denaturation** | **Annealing** | **Extension** | **Cycles** | **Size(bp)** | **reference** |
| *sfa/foc* * | F(5’-CTCCGGAGAACTGGGTGCATCTTAC-3’)  R(5’-CGGAGGAGTAATTACAAACCTGGCA-3’) | 94ºC, 30 s | 59°C, 30 s | 72ºC, 90 s | 35 | 410 | [1] |
| *fyuA** | F(5’-TGATTAACCCCGCGACGGGAA-3’)  R(5’-CGCAGTAGGCACGATGTTGTA-3’) | 94ºC, 30 s | 59°C, 30 s | 72ºC, 90 s | 35 | 787 | [2] |
| *fimH* | F(5’-TGCAGAACGGATAAGCCGTGG-3’)  R(5’-GCAGTCACCTGCCCTCCGGTA-3’) | 94ºC, 30 s | 62°C, 30 s | 72ºC, 90 s | 35 | 508 | [3] |
| *iroN* | F(5’-AAGTCAAAGCAGGGGTTGCC -3’)  R(5’-GACGCCGACATTAAGACGCAG-3’) | 94ºC, 30 s | 62°C, 30 s | 72ºC, 90 s | 35 | 665 | [3] |
| *aer* | F(5’-AAACCTGGCTTACGCAACTGT-3’)  R(5’-ACCCGTCTGCAAATCATGGAT-3’) | 94ºC, 30 s | 60°C, 60 s | 68ºC, 90 s | 30 | 269 | [4] |
| *hlyA* | F(5’-AGATTCTTGGGCATGTATCCT-3’)  R(5’-TTGCTTTGCAGACTGTAGTGT-3’) | 94ºC, 30 s | 65°C, 60 s | 68ºC, 90 s | 30 | 556 | [4] |
| *cvaC* | F(5’-CACACACAAACGGGAGCTGTT-3’)  R(5’ CTTCCCGCAGCATAGTTCCAT-3’) | 94ºC, 30 s | 63 °C, 30 s | 72ºC, 90 s | 35 | 680 | [2] |
| *iutA* | F(5’-GGCTGGACATCATGGGAACTGG-3’)  R(5’-CGTCGGGAACGGGTAGAATCG-3’) | 94ºC, 30 s | 63 °C, 30 s | 72ºC, 90 s | 35 | 300 | [5] |
| *ireA* | F(5’-AGATACGCTTGTTGTTAC-3’)  R(5’-CATTCCATGCTGCTAC-3’) | 94ºC, 30 s | 54°C, 30 s | 72ºC, 90 s | 35 | 788 | [6] |

*These genes were analyzed in multiplex PCR. The others were analyzed in single PCR.

**Antibiotic categories used to classify multidrug resistance.**

Antibiotic categories according to the classification of Magiorakos *et al* [7]. The number of strains evaluated for each antibiotic is shown in parentheses.

1: Penicillins: ampicillin (n=142) or amoxicillin (n=14).

2: 1st and 2nd generation cephalosporins: cephalothin (n=82), cefazolin (n=56), cefuroxime (n=54), cefoxitin (n=7).

3: 3rd and 4th generation cephalosporins: ceftriaxone (n=119), cefepime (n=102), ceftazidime (n=85) and cefotaxime (n=73).

4: Penicillins plus β-lactamase inhibitor: amoxicillin-clavulanic acid (n=100) and ampicillin sulbactam (n=4).

5: Antipseudomonal penicillins plus β-lactamase inhibitor: piperacillin-tazobactam (n=113).

6: Aminoglycosides: amikacin (n=149) and gentamicin (n=138).

7: Carbapenes: imepenem (n=105), ertapenem (n=92), and meropenem (n=49).

8: 2nd generation quinolones (fluoroquinolones): ciprofloxacin (n=145), norfloxacin (n=81), and Levofloxacin (n=49).

9: 1st generation quinolone: nalidixic acid (n=65).

10: Monobactams: aztreonam (n=56).

11: Nitrofuran: nitrofurantoin (n=140).

12: Folate pathway inhibitors: trimethoprim/sulfamethoxazole (SXT) (n=147).

[1] Le Bouguénec C, Schouler C. Sugar metabolism, an additional virulence factor in enterobacteria. Int J Med Microbiol 2011;301(1):1-6. https://doi:10.1016/j.ijmm.2010.04.021.

[2] Johnson JR, Stell AL. Extended virulence genotypes of *Escherichia coli* strains from patients with urosepsis in relation to phylogeny and host compromise. J Infect Dis 2000;181(1):261-72. https://doi:10.1086/315217.

[3] Basu S, Mukherjee SK, Hazra A, Mukherjee M. Molecular Characterization of Uropathogenic *Escherichia coli*: Nalidixic Acid and Ciprofloxacin Resistance, Virulent Factors and Phylogenetic Background. J Clin Diagn Res 2013;7(12):2727-31. https://doi:10.7860/JCDR/2013/6613.3744.

[4] Bingen E, Picard B, Brahimi N, Mathy S, Desjardins P, Elion J, et al. Phylogenetic analysis of *Escherichia coli* strains causing neonatal meningitis suggests horizontal gene transfer from a predominant pool of highly virulent B2 group strains J Infect Dis. 1998;177(3):642-50. https://doi: 10.1086/514217.

[5] Johnson JR, Stapleton AE, Russo TA, Scheutz F, Brown JJ, Maslow JN. Characteristics and prevalence within serogroup O4 of a J96-like clonal group of uropathogenic *Escherichia coli* O4:H5 containing the class I and class III alleles of *papG*. Infect Immun 1997;65(6):2153-9. https://doi:10.1128/iai.65.6.2153-2159.1997.

[6] Li Y, Dai J, Zhuge X, Wang H, Hu L, Ren J, et al. Iron-regulated gene *ireA* in avian pathogenic *Escherichia coli* participates in adhesion and stress-resistance. BMC Vet Res 2016;12(1):167. https://doi.10.1186/s12917-016-0800-y.

[7] Magiorakos AP, Srinivasan A, Carey RB, Carmeli Y, Falagas ME, Giske, CG, et al. Multidrug-resistant, extensively drug-resistant and pandrug-resistant bacteria: an international expert proposal for interim standard definitions for acquired resistance. Clin Microbiol Infect 2012;18(3):268-81. https://doi.10.1111/j.1469-0691.2011.03570.x.
